# Supplementary material for: Dietary Garlic Powder Alleviates Lipopolysaccharide-Induced Inflammatory Response and Oxidative Stress through Regulating the Immunity and Intestinal Barrier Function in Broilers
Source: MDPI journal article supplement (doi:10.3390/ani12172281), 2022-09-02
Supplement: s1 [file s1]

**Table S1.** Composition and nutrient levels of basal diets (air-dry basis, %).

| Items                  | Contents            |                      |
|------------------------|---------------------|----------------------|
|                        | 1 to 21 days of age | 22 to 42 days of age |
| Ingredients            |                     |                      |
| Corn                   | 52.5                | 54                   |
| Soybean meal           | 25                  | 17                   |
| Extruded soybean       | 4.5                 | 3.5                  |
| DDGS                   | 8.5                 | 7.5                  |
| Rice bran              |                     | 6                    |
| Corn gluten            |                     | 2                    |
| Soybean oil            | 1.7                 | 4.6                  |
| Limestone              | 1.4                 | 1.4                  |
| Fermented soybean meal | 2.4                 |                      |
| Premix <sup>1</sup>    | 4                   | 4                    |
| Total                  | 100.00              | 100.00               |
| Nutrient levels        |                     |                      |
| CP                     | 22.02               | 19.11                |
| ME (MJ/kg)             | 12.23               | 12.91                |
| EE                     | 5.5                 | 8.6                  |
| Lys                    | 1.18                | 0.97                 |
| Met                    | 0.54                | 0.45                 |
| Met+Cys                | 0.88                | 0.74                 |
| Thr                    | 0.86                | 0.71                 |
| Try                    | 0.23                | 0.20                 |
| Ca                     | 0.82                | 0.73                 |
| TP                     | 0.65                | 0.57                 |

<sup>1</sup> The premix provided the following per kg of diets: V<sub>A</sub> 10 000 IU, V<sub>B1</sub> 2.2 mg, V<sub>B2</sub> 8.0 mg, V<sub>B5</sub> 40 mg, V<sub>B6</sub> 4.0 mg, V<sub>B12</sub> 0.013 mg, V<sub>D3</sub> 3 000 IU, V<sub>E</sub> 30 IU, V<sub>K3</sub> 1.3 mg, biotin 0.04 mg, folic acid 40 mg, D-pantothenate calcium 10 mg, nicotinic acid 40 mg, choline chloride 400 mg, Cu 7.5 mg, Fe 80 mg, Mn 110 mg, Zn 65 mg, I 1.1 mg, Se 0.3 mg.

**Table S2.** Primer sequences for real-time PCR assay.

| Gene <sup>1</sup> | Genbank id     | Primer sequence, sense/antisense                   | Product size, bp |
|-------------------|----------------|----------------------------------------------------|------------------|
| <i>β-actin</i>    | NM_205518.1    | TGCTGTGTTCCCATCTATCG<br>TTGGTGACAATACCGTGTTCA      | 150              |
| <i>TLR2</i>       | AB046533       | CATTCACCATGAGGCAGGGATAG<br>GGTGCAGATCAAGGACACTAGGA | 157              |
| <i>TLR4</i>       | NM_001030693.1 | TGACCTACCCATCGGACACT<br>CTCAGGGCATCAAGGTCTCC       | 171              |
| <i>MyD88</i>      | NM_001030962.4 | GATGATCCGTATGGGCATGGA<br>ATGGACCACACACACGTTCC      | 170              |
| <i>NF-κB</i>      | XM_015285418.2 | TGCCTTTTGCTTGAGGGTGATG<br>CTGCCAGTTTTGTGAAGCCC     | 100              |
| <i>IL-4</i>       | NM_001007079.2 | AGCACTGCCACAAGAACCT<br>GCTAGTTGGTGGAAGAAGGTAC      | 160              |
| <i>IL-1β</i>      | NM_204524.1    | GTACCGAGTACAACCCCTGC<br>AGCAACGGGACGGTAATGAA       | 112              |
| <i>TNF-α</i>      | NM204267.1     | CCGTAGTGCTGTTCTATGACCG<br>GTTCCACATCTTTCAGAGCATCAA | 235              |
| <i>MUC-2</i>      | XM_001234581.3 | AGGAATGGGCTGCAAGAGAC<br>GTGACATCAGGGCACACAGA       | 77               |
| <i>Occludin</i>   | NM_205128.1    | AGCCCTCAATACCAGGATGTG<br>CGCTTGATGTGGAAGAGCTTG     | 125              |
| <i>Claudin-1</i>  | NM_001013611.2 | CACACCCGTTAACACCAGATTT<br>GAGGGGGGCATTTTTGGGGTA    | 159              |
| <i>ZO-1</i>       | XM_015278980.2 | GGATGTTTATTTGGGCGGCT<br>CCATTGTTGCACTCTTGCCG       | 153              |

<sup>1</sup> TLR2, 4=toll-like receptors 2, 4; MyD88=myeloid differentiation factor 88; NF-κB=nuclear factor-kappa B; IL-4= interleukin-4; IL-1β=interleukin-1β; TNF-α=tumor necrosis factor-α; MUC-2=mucoprotein 2; ZO-1=zonula occludens-1.
